# Supplementary material
Source: Springer Nature journal article supplement (https://www.springermedizin.de/resource/supplementary/13058_2011_2974_MOESM15_ESM.pdf/9702984)

A

rs1799943

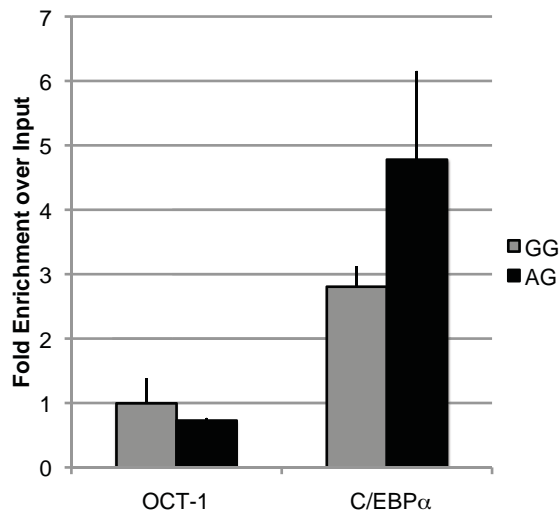

B

rs9567576

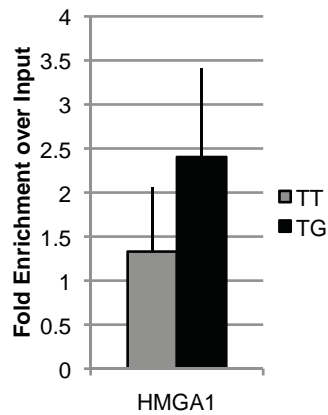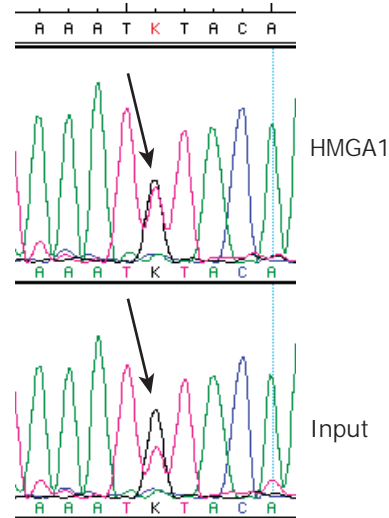

C

rs4942485

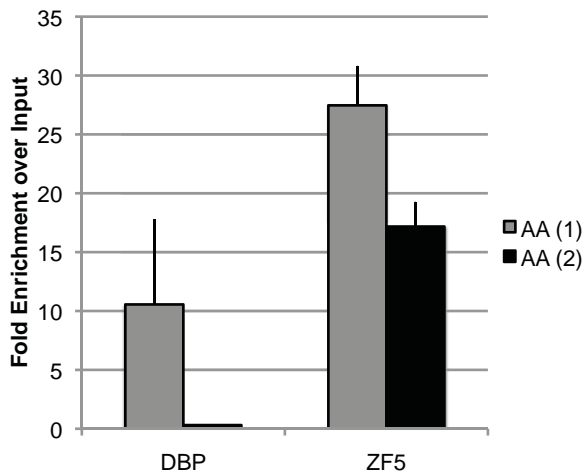

Supplement: MOESM15 [file 9702984]
